# Supplementary material for: Identification of cancer-associated fibroblasts subtypes in prostate cancer
Source: Front Immunol. 2023 Mar 24;14:1133160. doi: 10.3389/fimmu.2023.1133160 (PMC10080037; doi:10.3389/fimmu.2023.1133160)
Supplement: Supplementary file 2 [file Table_1.xlsx]

## Sheet: Sheet1
Supplemental table 1. Prostate cancer samples used in analysis.
Sample source	Sample	Tumor site	Tumor status
GSE157703	GSM4773521	Prostate	HSPC
GSE157703	GSM4773522	Prostate	HSPC
GSE176031	GSM5353214	Prostate	HSPC
GSE176031	GSM5353215	Prostate	HSPC
GSE176031	GSM5353216	Prostate	HSPC
GSE176031	GSM5353217	Prostate	HSPC
GSE176031	GSM5353224	Prostate	HSPC
GSE176031	GSM5353225	Prostate	HSPC
GSE176031	GSM5353226	Prostate	HSPC
GSE176031	GSM5353232	Prostate	HSPC
GSE176031	GSM5353233	Prostate	HSPC
GSE176031	GSM5353236	Prostate	HSPC
GSE176031	GSM5353237	Prostate	HSPC
GSE176031	GSM5353240	Prostate	HSPC
GSE176031	GSM5353243	Prostate	HSPC
GSE176031	GSM5353244	Prostate	HSPC
GSE141445	GSM4203181_1	Prostate	HSPC
GSE141445	GSM4203181 _2	Prostate	HSPC
GSE141445	GSM4203181 _3	Prostate	HSPC
GSE141445	GSM4203181 _7	Prostate	HSPC
GSE141445	GSM4203181 _8	Prostate	HSPC
GSE141445	GSM4203181 _9	Prostate	HSPC
GSE141445	GSM4203181 _10	Prostate	HSPC
GSE141445	GSM4203181 _11	Prostate	HSPC
GSE141445	GSM4203181 _12	Prostate	HSPC
GSE141445	GSM4203181 _13	Prostate	HSPC
GSE137829	GSM4089151	Prostate	CRPC
GSE137829	GSM4089152	Prostate	CRPC
GSE137829	GSM4089153	Prostate	CRPC
GSE137829	GSM4089154	Prostate	CRPC
GSE137829	GSM4711414	Prostate	CRPC
GSE137829	GSM4711415	Prostate	CRPC
GSE206962	GSM6267383	Prostate	CRPC
GSE206962	GSM6267384	Prostate	CRPC
GSE143791	GSM4274678	Bone Tumor	CRPC
GSE143792	GSM4274679	Bone Involved	CRPC
GSE143793	GSM4274680	Bone Distal	CRPC
GSE143794	GSM4274681	Bone Involved	CRPC
GSE143795	GSM4274682	Bone Tumor	CRPC
GSE143796	GSM4274683	Bone Tumor	CRPC
GSE143797	GSM4274684	Bone Involved	CRPC
GSE143798	GSM4274685	Bone Distal	CRPC
GSE143799	GSM4274686	Bone Tumor	CRPC
GSE143800	GSM4274687	Bone Involved	CRPC
GSE143801	GSM4274688	Bone Distal	CRPC
GSE143802	GSM4274689	Bone Tumor	CRPC
GSE143803	GSM4274690	Bone Involved	CRPC
GSE143804	GSM4274691	Bone Distal	CRPC
GSE143805	GSM4274692	Bone Tumor	CRPC
GSE143806	GSM4274693	Bone Distal	CRPC
GSE143807	GSM4274694	Bone Involved	CRPC
GSE143808	GSM4274695	Bone Distal	CRPC
GSE143809	GSM4274696	Bone Involved	CRPC
GSE143810	GSM4274697	Bone Tumor	CRPC
GSE143811	GSM4274698	Bone Tumor	CRPC
GSE143812	GSM4274699	Bone Distal	CRPC
GSE143813	GSM4274700	Bone Involved	CRPC
GSE143814	GSM4274701	Bone Tumor	CRPC
GSE143815	GSM4274702	Bone Distal	CRPC
